# Supplementary material
Source: HighWire-hosted journal article supplement (https://bmjophth.bmj.com/content/4/1/e000242)
Supplement: inline-supplementary-material-2 [file inline-supplementary-material-2.docx]

**Supplemental Table 2.** Individual patient details of the control group including pre-cataract and post-cataract surgery refraction

| Age | Gender | Pre surgical sphere | Pre surgical cylinder | Pre surgical axis | Post surgical sphere | Post surgical cylinder | Post surgical axis |
| --- | --- | --- | --- | --- | --- | --- | --- |
| 75 | Female | -4.00 | +1.50 | 131 | -0.50 | +1.25 | 160 |
| 78 | Male | . | . | . | -0.50 | +1.00 | 15 |
| 73 | Male | -4.75 | +1.50 | 105 | -0.25 | +0.25 | 105 |
| 86 | Female | +2.75 | +1.50 | 135 | -1.00 | +1.50 | 145 |
| 72 | Male | +4.50 | +2.00 | 165 | -0.50 | +1.50 | 165 |
| 72 | Male | -3.00 | +0.50 | 140 | -0.50 | +1.00 | 10 |
| 80 | Male | -1.50 | +1.00 | 140 | -0.50 | +0.75 | 160 |
| 67 | Female | +0.50 | +0.50 | 45 | -0.50 | +0.75 | 25 |
| 68 | Female | 0.00 | +1.00 | 160 | -0.75 | +0.75 | 40 |
| 74 | Female | -2.50 | +2.50 | 177 | -2.00 | +1.75 | 170 |
| 78 | Female | +1.75 | +1.00 | 0 | -1.25 | +2.25 | 5 |
| 78 | Male | +2.25 | +0.50 | 140 | 0.00 | +0.50 | 75 |
| 59 | Male | +1.50 | 0.00 |  | -1.25 | +0.50 | 130 |
| 80 | Male | +2.25 | +0.50 | 11 | -1.50 | +1.00 | 160 |
| 74 | Female | -1.00 | +2.25 | 5 | -0.75 | +2.00 | 175 |
| 86 | Female | -1.75 | +1.00 | 0 | -1.00 | +0.75 | 10 |
| 83 | Female | -1.50 | -1.50 | 94 | -1.00 | +2.00 | 180 |
| 79 | Female | +1.25 | +2.00 | 180 | -2.25 | +2.00 | 160 |
| 82 | Male | 0.00 | +0.75 | 40 | -2.00 | +1.25 | 75 |

. denotes missing data
